# Supplementary material for: A Pilot Randomised Clinical Trial Comparing a Short-Term Perioperative Prophylaxis Regimen to a Long-Term Standard Protocol in Equine Colic Surgery
Source: MDPI journal article supplement (doi:10.3390/antibiotics10050587), 2021-05-16
Supplement: s1 [file s1]

| Number | Antibiotics | Date of surgery | Relaparotomy | Gender   | Age (years) |
|--------|-------------|-----------------|--------------|----------|-------------|
| 1      | 5 days      | 2018/1/10       | no           | Mare     | 11          |
| 2      | single shot | 2018/1/29       | no           | Mare     | 4           |
| 3      | single shot | 2018/2/3        | no           | Gelding  | 7           |
| 4      | single shot | 2018/2/3        | no           | Mare     | 16          |
| 5      | 5 days      | 2018/2/16       | no           | Mare     | 19          |
| 6      | 5 days      | 2018/4/2        | no           | Stallion | 5           |
| 7      | single shot | 2018/4/20       | no           | Gelding  | 8           |
| 8      | single shot | 2018/4/26       | no           | Mare     | 7           |
| 9      | 5 days      | 2018/5/27       | no           | Mare     | 11          |
| 10     | single shot | 2018/7/5        | no           | Mare     | 5           |
| 11     | 5 days      | 2018/7/26       | yes          | Gelding  | 8           |
| 12     | 5 days      | 2018/8/5        | no           | Stallion | 7           |
| 13     | single shot | 2018/8/15       | no           | Gelding  | 13          |
| 14     | 5 days      | 2018/9/10       | no           | Stallion | 24          |

|    |             |            |     |         |    |
|----|-------------|------------|-----|---------|----|
| 15 | 5 days      | 2018/9/13  | no  | Gelding | 15 |
| 16 | 5 days      | 2018/9/27  | no  | Gelding | 24 |
| 17 | single shot | 2018/10/1  | no  | Gelding | 24 |
| 18 | 5 days      | 2018/10/9  | no  | Mare    | 15 |
| 19 | single shot | 2018/10/13 | no  | Mare    | 20 |
| 20 | single shot | 2018/11/1  | no  | Gelding | 9  |
| 21 | single shot | 2018/11/4  | no  | Gelding | 4  |
| 22 | single shot | 2018/11/17 | yes | Gelding | 9  |
| 23 | single shot | 2018/11/26 | no  | Gelding | 25 |
| 24 | single shot | 2019/1/3   | no  | Gelding | 9  |
| 25 | 5 days      | 2019/1/6   | no  | Gelding | 4  |
| 26 | single shot | 2019/1/27  | no  | Mare    | 15 |
| 27 | single shot | 2019/2/4   | no  | Mare    | 6  |
| 28 | single shot | 2019/2/10  | no  | Gelding | 11 |
| 29 | single shot | 2019/2/11  | no  | Gelding | 20 |
| 30 | 5 days      | 2019/2/14  | yes | Gelding | 13 |
| 31 | single shot | 2019/2/16  | no  | Gelding | 22 |
| 32 | 5 days      | 2019/3/4   | no  | Mare    | 22 |
| 33 | 5 days      | 2019/3/19  | no  | Mare    | 23 |
| 34 | 5 days      | 2019/3/31  | no  | Gelding | 23 |
| 35 | 5 days      | 2019/4/17  | yes | Gelding | 27 |
| 36 | 5 days      | 2019/4/20  | no  | Mare    | 17 |
| 37 | 5 days      | 2019/5/2   | no  | Mare    | 16 |
| 38 | 5 days      | 2019/5/6   | no  | Mare    | 26 |

|    |             |            |    |          |         |
|----|-------------|------------|----|----------|---------|
| 39 | 5 days      | 2019/5/23  | no | Mare     | 9       |
| 40 | single shot | 2019/5/27  | no | Gelding  | 13      |
| 41 | 5 days      | 2019/7/4   | no | Gelding  | 19      |
| 42 | 5 days      | 2019/7/6   | no | Mare     | 14      |
| 43 | 5 days      | 2019/7/11  | no | Mare     | 4       |
| 44 | 5 days      | 2019/7/21  | no | Stallion | 0.42    |
| 45 | 5 days      | 2019/7/23  | no | Gelding  | 29      |
| 46 | single shot | 2019/7/29  | no | Mare     | 10      |
| 47 | 5 days      | 2019/8/3   | no | Stallion | 12      |
| 48 | 5 days      | 2019/8/7   | no | Gelding  | 20      |
| 49 | 5 days      | 2019/8/11  | no | Mare     | 12      |
| 50 | single shot | 2019/8/15  | no | Mare     | 13      |
| 51 | single shot | 2019/9/5   | no | Mare     | 6       |
| 52 | 5 days      | 2019/9/11  | no | Gelding  | 16      |
| 53 | single shot | 2019/9/26  | no | Mare     | 21      |
| 54 | single shot | 2019/10/22 | no | Gelding  | 15      |
| 55 | single shot | 2019/11/4  | no | Gelding  | 9       |
| 56 | 5 days      | 2019/11/9  | no | Mare     | 1       |
| 57 | single shot | 2019/11/9  | no | Mare     | 14      |
| 58 | 5 days      | 2019/12/14 | no | Mare     | 0.58    |
| 59 | 5 days      | 2020/1/5   | no | Gelding  | 20      |
| 60 | 5 days      | 2020/1/7   | no | Stallion | 2       |
| 61 | 5 days      | 2020/1/19  | no | Gelding  | 8       |
| 62 | 5 days      | 2020/1/21  | no | Mare     | unknown |
| 63 | single shot | 2020/1/31  | no | Gelding  | 7       |
| 64 | 5 days      | 2020/2/11  | no | Gelding  | 6       |
| 65 | single shot | 2020/2/14  | no | Mare     | 17      |
| 66 | single shot | 2020/2/19  | no | Mare     | 27      |

|    |        |           |    |         |    |
|----|--------|-----------|----|---------|----|
| 67 | 5 days | 2020/2/24 | no | Gelding | 30 |
|----|--------|-----------|----|---------|----|

| Breed                  | Classification of surgery | Localisation of the surgical lesion | SSI during the first 10 days post operatively | SSI total              |
|------------------------|---------------------------|-------------------------------------|-----------------------------------------------|------------------------|
| Quarab                 | clean                     | Large intestinal                    | no                                            | no                     |
| Mecklenburger          | clean-contaminated        | Small intestinal                    | no                                            | no                     |
| Hanoverian             | clean                     | Small intestinal                    | no                                            | no                     |
| Trakehner              | clean-contaminated        | Large intestinal                    | no                                            | no                     |
| Brandenburger          | clean-contaminated        | Large intestinal                    | no                                            | no                     |
| German Sports Horse    | clean                     | Small intestinal                    | no                                            | no                     |
| German Sports Horse    | clean                     | Small intestinal                    | no                                            | no                     |
| Polish Warmblood       | clean-contaminated        | Large intestinal                    | no                                            | lost to follow up      |
| German Sports Horse    | clean-contaminated        | Large intestinal                    | no                                            | no                     |
| Thoroughbred           | clean-contaminated        | Large intestinal                    | no                                            | yes                    |
| American Quarter Horse | clean-contaminated        | Small and large intestinal          | No                                            | yes after relaparotomy |
| Warmblood              | clean-contaminated        | Large intestinal                    | no                                            | no                     |
| Hanoverian             | clean-contaminated        | Small intestinal                    | yes                                           | yes                    |
| Shetland Pony          | clean-contaminated        | Large intestinal                    | no                                            | no                     |

|                          |                    |                            |     |                   |
|--------------------------|--------------------|----------------------------|-----|-------------------|
| Warmblood                | clean-contaminated | Large intestinal           | no  | no                |
| Konik                    | clean-contaminated | Large intestinal           | no  | no                |
| Shetland Pony            | clean-contaminated | Large intestinal           | no  | no                |
| German Riding Pony       | clean-contaminated | Large intestinal           | no  | no                |
|                          |                    |                            |     |                   |
| Hanoverian               | clean-contaminated | Small intestinal           | yes | yes               |
| Thoroughbred             | clean-contaminated | Large intestinal           | no  | no                |
| American Miniature Horse | clean-contaminated | Large intestinal           | no  | no                |
| Oldenburger              | clean-contaminated | Small intestinal           | no  | no                |
| Haflinger - Cross        | clean-contaminated | Large intestinal           | no  | no                |
|                          |                    |                            |     |                   |
| Holsteiner               | clean-contaminated | Large intestinal           | no  | lost to follow up |
| German Sports Horse      | clean-contaminated | Large intestinal           | no  | no                |
| Pony - Cross             | clean              | Large intestinal           | no  | no                |
| German Sports Horse      | clean              | Small intestinal           | no  | lost to follow up |
| German Sports Horse      | clean              | Large intestinal           | no  | yes               |
|                          |                    |                            |     |                   |
| Trakehner                | clean              | Small and large intestinal | yes | yes               |
| Mecklenburger            | clean-contaminated | Small intestinal           | no  | no                |
| Sachsen - Anhaltiner     | clean              | Small intestinal           | no  | no                |
| Bavarian Warmblood       | clean-contaminated | Large intestinal           | no  | no                |
| Brandenburger            | clean-contaminated | Small and large intestinal | no  | no                |
| Brandenburger            | clean-contaminated | Small and large intestinal | no  | no                |
| Icelandic horse          | clean              | Small intestinal           | no  | no                |
|                          |                    |                            |     |                   |
| American Quarter Horse   | clean-contaminated | Large intestinal           | no  | no                |
| Haflinger                | clean-contaminated | Small intestinal           | no  | no                |
| Shetland Pony            | clean-contaminated | Large intestinal           | no  | no                |

|                             |                    |                            |     |                   |
|-----------------------------|--------------------|----------------------------|-----|-------------------|
| Shetland Pony               | clean-contaminated | Large intestinal           | no  | no                |
| German Sports Horse         | clean              | Large intestinal           | no  | no                |
| Paint Horse                 | clean-contaminated | Small intestinal           | yes | yes               |
| Warmblood                   | clean-contaminated | Large intestinal           | no  | no                |
| Norwegian Fjord Horse Cross | clean              | Small intestinal           | no  | no                |
| Warmblood                   | clean-contaminated | Small intestinal           | no  | no                |
| Arabian Horse               | clean              | Large intestinal           | no  | no                |
| Lewitzer                    | clean-contaminated | Large intestinal           | no  | yes               |
| German Riding Pony          | clean-contaminated | Large intestinal           | no  | no                |
| German Riding Horse         | clean              | Small intestinal           | no  | no                |
| Standardbred-Cross          | clean              | Small intestinal           | no  | lost to follow up |
| Pony                        | clean-contaminated | Small intestinal           | no  | no                |
| Hanoverian                  | clean-contaminated | Large intestinal           | no  | lost to follow up |
| Mecklenburger               | clean-contaminated | Large intestinal           | no  | no                |
| Shetland Pony               | clean-contaminated | Small intestinal           | no  | no                |
| Friesian                    | clean-contaminated | Large intestinal           | no  | lost to follow up |
| American Quarter Horse      | clean              | Small and large intestinal | no  | no                |
| Noriker                     | clean-contaminated | Large intestinal           | no  | no                |
| Haflinger                   | clean-contaminated | Large intestinal           | no  | lost to follow up |
| Haflinger                   | clean              | Small intestinal           | no  | no                |
| Brandenburger               | clean              | Small intestinal           | no  | no                |
| Traber                      | clean-contaminated | diaphragmatic hernia       | no  | no                |
| German Sports Horse         | clean-contaminated | Large intestinal           | no  | no                |
| Draft Horse                 | clean-contaminated | Small intestinal           | no  | yes               |
| Thoroughbred                | clean              | Large intestinal           | no  | no                |
| Oldenburger                 | clean-contaminated | Large intestinal           | no  | lost to follow up |
| Warmblood                   | clean              | Large intestinal           | no  | no                |
| Thoroughbred                | clean              | Small intestinal           | yes | yes               |

|                          |                    |                  |    |    |
|--------------------------|--------------------|------------------|----|----|
| Norwegian<br>Fjord Horse | clean-contaminated | Large intestinal | no | no |
|--------------------------|--------------------|------------------|----|----|



| Results of the microbiological examination of the swab                                                            | Colitis | Hemolysis | WBC prior to surgery (x10 <sup>3</sup> /μl) | SAA prior to surgery (μg/ml) | Fibrinogen prior to surgery (mg/dl) |
|-------------------------------------------------------------------------------------------------------------------|---------|-----------|---------------------------------------------|------------------------------|-------------------------------------|
|                                                                                                                   | no      | no        | 6.92                                        | 127.91                       | 168                                 |
|                                                                                                                   | no      | no        | 10.48                                       | 748.68                       | 184                                 |
|                                                                                                                   | no      | no        | 8.21                                        |                              | 445                                 |
|                                                                                                                   | no      | no        | 8.88                                        |                              | 218                                 |
|                                                                                                                   | no      | no        | 5.93                                        | 3.5                          | 139                                 |
|                                                                                                                   | no      | no        | 9.62                                        | 36.24                        | 217                                 |
|                                                                                                                   | no      | no        | 5.68                                        | 3.5                          | 162                                 |
|                                                                                                                   | no      | no        | 12.01                                       | 3.5                          | 172                                 |
|                                                                                                                   | no      | no        | 10.75                                       | 7.13                         | 189                                 |
| Enterococcus faecium, Staphylococcus epidemicus (methicillin resistant)                                           | no      | no        | 10.74                                       | 4.7                          | 96.54                               |
| SBL-producing Enterobacter cloacae, Enterococcus faecalis, Klebsiella pneumoniae, E. coli, Pseudomonas aeruginosa | no      | no        | 7.48                                        | 37.87                        | 167                                 |
|                                                                                                                   | yes     | no        | 5.87                                        | 7.28                         | 355                                 |
| ESBL-producing Enterobacter cloacae                                                                               | no      | no        | 10.87                                       | 6.39                         | 217                                 |
|                                                                                                                   | no      | no        | 16.74                                       | 136.57                       | 235                                 |

|                                                                        |     |     |       |        |        |
|------------------------------------------------------------------------|-----|-----|-------|--------|--------|
|                                                                        | no  | no  | 2.92  | 69.27  | 189    |
|                                                                        | no  | no  | 9.21  | 7.97   | 235    |
|                                                                        | no  | no  | 7.83  |        | 128    |
|                                                                        | no  | yes | 12.82 | 3.5    | 226    |
| MRSA, Edvherichia coli,<br>Fusobacterium spp.,<br>Bacteroides fragiles | no  | no  | 6.93  | 317.33 | 167.42 |
|                                                                        | no  | no  | 7.02  | 4.19   | 211    |
|                                                                        | no  | no  | 9.34  | 146.98 | 171    |
|                                                                        | no  | no  | 10.27 |        | 116    |
|                                                                        | yes | no  | 7.84  |        | 261    |
|                                                                        | no  | no  | 8.44  | 35.65  | 128    |
|                                                                        | no  | no  | 5.21  | 470.45 | 275    |
|                                                                        | no  | no  | 5.81  | 14.34  | 135    |
|                                                                        | no  | no  | 11.47 | 11.39  | 135    |
|                                                                        | no  | no  | 6.7   | 12.3   | 188    |
| Escherichia coli,<br>Enterobacter cloacae,<br>Enterococcus faecium     | no  | no  | 13.66 | 9.66   | 203    |
|                                                                        | no  | no  | 9.25  | 11.94  | 93.33  |
|                                                                        | no  | no  | 9.8   |        | 131    |
|                                                                        | no  | no  | 9.05  | 7.4    | 171    |
|                                                                        | yes | no  | 13.21 | 19.01  | 183    |
|                                                                        | no  | no  | 7.3   |        |        |
|                                                                        | no  | no  | 14.58 | 30.47  | 183    |
|                                                                        | no  | no  | 8.43  | 18.5   | 145.81 |
|                                                                        | no  | no  | 10.04 | 24.54  | 177    |
|                                                                        | no  | no  | 2.12  | 514.65 | 202    |

|  |     |     |       |        |        |
|--|-----|-----|-------|--------|--------|
|  | no  | no  | 6.33  | 3.5    | 226    |
|  | no  | no  | 9.67  | 4.37   | 195    |
|  | no  | no  | 18.97 | 9.24   | 308    |
|  | no  | no  | 6.55  | 96.52  | 226    |
|  |     |     |       |        |        |
|  | no  | no  | 3.07  | 3.5    | 182    |
|  | no  | no  | 12.75 | 67.34  | 120    |
|  |     |     |       |        |        |
|  | no  | no  | 8.26  | 4.28   | 209    |
|  | no  | no  | 11.76 | 3.56   | 134    |
|  |     |     |       |        |        |
|  | no  | no  | 10.88 | 5.01   | 188    |
|  | no  | no  | 10.79 | 649.36 | 149.07 |
|  |     |     |       |        |        |
|  | no  | no  | 3.8   |        |        |
|  | no  | no  | 8.76  | 4.18   | 195    |
|  |     |     |       |        |        |
|  | no  | no  | 8.16  |        |        |
|  |     |     |       |        |        |
|  | no  | no  | 10.43 | 15.3   | 218    |
|  |     |     |       |        |        |
|  | no  | no  | 5.28  | 126.15 | 236    |
|  |     |     |       |        |        |
|  | no  | no  | 6.98  | 14.46  | 300    |
|  |     |     |       |        |        |
|  | no  | no  | 8.5   | 112.65 | 246    |
|  | yes | no  | 8.75  |        |        |
|  |     |     |       |        |        |
|  | no  | no  | 2.6   |        |        |
|  | no  | no  | 9.36  |        |        |
|  |     |     |       |        |        |
|  | no  | no  | 11.64 |        |        |
|  |     |     |       |        |        |
|  | no  | yes | 13.46 |        | 218    |
|  |     |     |       |        |        |
|  | no  | no  | 11.75 |        | 209    |
|  | yes | yes | 9.88  | 12.16  |        |
|  | no  | no  | 7.43  | 35.56  |        |
|  |     |     |       |        |        |
|  | no  | no  | 8.64  | 18.29  | 182    |
|  | no  | no  | 6     | 20.57  | 184    |
|  | no  | no  | 9.91  | 14.73  | 134    |

|  |    |    |      |       |     |
|--|----|----|------|-------|-----|
|  | no | no | 8.62 | 24.49 | 192 |
|--|----|----|------|-------|-----|

| WBC day 1 morning (x10 <sup>3</sup> /μl) | SAA day 1 (μg/ml) | Fibrinogen day 1 (mg/dl) | WBC day 1 evening (x10 <sup>3</sup> /μl) | WBC day 2 morning (x10 <sup>3</sup> /μl) | SAA day 2 (μg/ml) | F1 fibrinogen day 2 (mg/dl) |
|------------------------------------------|-------------------|--------------------------|------------------------------------------|------------------------------------------|-------------------|-----------------------------|
| 4                                        | 647.4             | 220                      | 3.53                                     | 2.63                                     | 800.33            | 251                         |
| 10.64                                    | 964.42            | 240                      | 9.86                                     | 9.42                                     | 987.13            | 299                         |
| 4.16                                     | 788.61            | 212                      | 3.88                                     | 3.4                                      | 831               | 212                         |
| 8.99                                     | 735.76            | 240                      | 7.5                                      | 5.34                                     | 875.01            | 278                         |
| 6.13                                     | 837.41            | 235                      | 6.05                                     | 5.09                                     | 896.5             | 256                         |
| 1.43                                     | 727.6             | 324                      | 2.01                                     | 2.03                                     | 1011.8            | 324                         |
| 6.66                                     | 259.83            | 143                      | 1.59                                     | 2                                        | 651.54            | 209                         |
| 6.53                                     | 724.77            | 245                      | 6.44                                     | 6.57                                     | 809.07            | 269                         |
| 7.28                                     | 931.21            | 226                      | 10.18                                    | 7.73                                     | 983.82            | 297                         |
| 2.63                                     | 584.71            | 79.22                    | 3.46                                     | 5.29                                     | 807.61            | 160.39                      |
| 6.89                                     | 637.6             | 245                      | 6.47                                     | 2.56                                     | 717.05            | 314                         |
| 3.14                                     | 374.19            | 189                      | 4.07                                     | 5.05                                     | 822.07            | 290                         |
| 10.58                                    | 555.73            | 226                      | 9.29                                     | 6.52                                     | 732.98            | 282                         |
| 2.93                                     | 542.11            | 245                      | 8.03                                     | 7.36                                     | 740.05            | 314                         |

|       |        |        |       |       |        |        |
|-------|--------|--------|-------|-------|--------|--------|
| 4.88  | 657.26 | 269    | 3.41  | 3.17  | 648.23 | 249    |
| 6.06  | 701.98 | 163.5  | 7.25  | 8.5   |        | 196    |
| 5.44  | 446.29 | 256    | 4.92  | 4.52  | 649.81 | 194.5  |
| 8.23  | 708.45 | 138.5  | 5.74  | 5.68  | 764.42 | 163.8  |
|       |        |        |       |       |        |        |
| 2.8   | 714.96 | 220.07 | 4.49  | 3.7   | 724.11 | 367    |
| 4.3   | 437.81 | 211    | 3.81  | 3.91  | 1043   | 228    |
|       |        |        |       |       |        |        |
| 4.63  | 752.1  | 290    | 5.44  | 4.77  | 772.36 | 270    |
| 12.25 |        | 306    | 9.68  | 5.19  |        | 249    |
| 23.59 | 502.79 | 249    | 23.8  | 20.49 | 615.21 | 325    |
| 6.43  | 651.62 | 238    | 5.57  | 4.83  | 666.22 | 282    |
| 5.41  | 563.71 | 325    | 4.83  | 4.26  | 952.98 | 308    |
| 3.5   | 343.31 | 203    | 5.5   | 4.99  | 735.23 | 261    |
| 7.25  | 661.07 | 189    | 7.04  | 3.14  |        | 246    |
| 3.47  | 588.91 | 196    | 3.45  | 2.45  | 652.26 | 238    |
|       |        |        |       |       |        |        |
| 12.79 | 671.05 | 290    | 7.76  | 4.92  | 721.25 | 153.82 |
| 3.91  | 428.23 | 96.56  | 6.4   | 4.6   | 658.04 | 104.79 |
| 3.16  | 790.89 | 128.97 | 3.71  | 4.42  | 842.11 | 249    |
| 4.02  | 785.12 | 249    | 3.89  | 4.33  | 652.18 | 275    |
| 6.23  | 735.14 | 317    | 10.62 | 10.76 | 757.59 | 238    |
| 3.48  | 787.78 | 178.75 | 4.91  | 4.6   | 1108.4 | 206.19 |
| 8.58  | 710.46 | 211    | 9.52  | 7.13  | 835.12 | 236    |
|       |        |        |       |       |        |        |
| 7.29  | 721.68 | 370    | 8.64  | 4.81  | 743.79 | 317    |
| 6.17  | 392.38 | 218    | 7.15  | 4.26  | 645.88 | 236    |
| 2.25  | 724.97 | 172.29 | 3.41  | 3.69  | 860.2  | 317    |

|       |        |        |       |       |        |        |
|-------|--------|--------|-------|-------|--------|--------|
| 7.35  | 269.13 | 284    | 10.58 | 6.92  | 721.05 | 300    |
| 6.07  | 565.66 | 236    | 3.59  | 2.61  | 618.44 | 258    |
| 10.16 | 208.31 | 258    | 12    | 11    | 591.41 | 317    |
| 5.22  | 547.02 | 326    | 1.97  | 1.38  |        | 226    |
|       |        |        |       |       |        |        |
| 7.34  | 637.25 | 270    | 7.3   | 7.52  | 686    | 308    |
| 6.22  | 812.34 | 258    | 3.34  | 3.2   | 884.56 | 411    |
|       |        |        |       |       |        |        |
| 12.16 | 228.18 | 218    | 6.91  | 4.54  | 672.38 | 281    |
| 3.82  | 301.58 | 177    | 4.05  | 7.87  | 569.92 | 284    |
|       |        |        |       |       |        |        |
| 6.91  | 727.04 | 127.95 | 10.71 | 12.26 | 600.08 | 300    |
|       |        |        |       |       |        |        |
| 6.05  | 518.53 | 236    | 7     | 4.69  | 874.73 | 317    |
|       |        |        |       |       |        |        |
| 5.38  | 641.79 | 226    | 4.96  | 4.37  | 469.34 | 270    |
| 7.15  | 630.22 | 246    | 5.16  | 4.54  | 644.1  | 258    |
|       |        |        |       |       |        |        |
| 6.16  | 654.69 | 484    | 4.84  | 5.88  | 911.97 | 358    |
|       |        |        |       |       |        |        |
| 7.76  | 691.37 | 202    | 9.88  | 8.85  | 11.98  | 370    |
|       |        |        |       |       |        |        |
| 6.3   | 497.12 | 182    | 5.1   | 1.48  | 628.36 | 236    |
|       |        |        |       |       |        |        |
| 9.06  | 676.32 | 300    | 8.45  | 7.02  | 777.61 | 445    |
|       |        |        |       |       |        |        |
| 6.64  | 477.1  | 258    | 9.17  | 5.97  | 633.7  | 317    |
| 4.89  | 563.69 | 218    | 6.25  | 9.5   | 822.75 | 308    |
|       |        |        |       |       |        |        |
| 2.03  | 800.13 | 246    | 4.08  | 2.06  | 831.56 | 300    |
| 7.95  | 878.16 |        | 6.91  | 6.71  | 572.27 | 147.28 |
|       |        |        |       |       |        |        |
| 3.13  | 540.62 | 209    | 5.63  | 3.95  |        |        |
|       |        |        |       |       |        |        |
| 7.47  | 866.32 |        | 7.96  | 5.61  | 935.33 |        |
|       |        |        |       |       |        |        |
| 4.8   | 19.1   | 182    | 5.75  | 4.14  | 904.38 | 317    |
| 3.33  | 635.08 | 300    | 2.78  | 2.15  | 844.58 | 347    |
| 5.97  |        | 149    | 7.91  | 7.98  | 843.3  | 258    |
|       |        |        |       |       |        |        |
| 4.78  | 523.21 | 193    | 4.73  | 4.22  |        |        |
| 6.45  | 511.42 | 176    | 3.95  | 2.65  | 630.86 | 214    |
| 4.76  | 477.74 | 148    | 7.19  | 6.85  | 618.2  | 245    |

|      |       |     |   |      |        |     |
|------|-------|-----|---|------|--------|-----|
| 4.44 | 379.2 | 188 | 6 | 3.02 | 563.96 | 216 |
|------|-------|-----|---|------|--------|-----|



| WBC day 2 evening (x10 <sup>3</sup> /μl) | WBC day3 morning (x10 <sup>3</sup> /μl) | SAA day 3 (μg/ml) | Fibrinogen day 3 (mg/dl) | WBC day 3 evening (x10 <sup>3</sup> /μl) | WBC day 4 morning (x10 <sup>3</sup> /μl) | SAA day 4 (μg/ml) |
|------------------------------------------|-----------------------------------------|-------------------|--------------------------|------------------------------------------|------------------------------------------|-------------------|
| 2                                        | 3.64                                    | 822.64            | 283                      | 3.43                                     | 3.83                                     | 787.48            |
| 10.93                                    | 10.44                                   | 954.33            | 326                      | 7.92                                     | 8.07                                     | 890.35            |
| 2.02                                     | 2.68                                    | 831.04            | 212                      | 2.8                                      | 4.21                                     | 741.46            |
| 4.75                                     | 3.49                                    | 872.45            | 240                      | 1.17                                     | 2.89                                     | 807.51            |
| 4.36                                     | 5.15                                    | 983.66            | 282                      | 5.22                                     | 4.74                                     | 964.86            |
| 3.04                                     | 4.17                                    | 1014.3            | 344                      | 4.1                                      | 4.85                                     | 1026.1            |
| 1.14                                     | 1.94                                    | 743.35            | 269                      |                                          |                                          |                   |
| 5.15                                     | 4.03                                    | 767.06            | 282                      | 4.25                                     | 3.88                                     | 673.57            |
| 8.72                                     | 6.36                                    | 973.3             | 206.13                   | 5.8                                      | 6.28                                     | 951.15            |
| 5.59                                     | 5.09                                    | 904.48            | 224.02                   | 4.73                                     | 5.54                                     |                   |
| 2.3                                      | 1.78                                    | 748.77            | 282                      | 4.9                                      | 6.01                                     | 668.75            |
| 4.77                                     | 4.76                                    | 834.34            | 324                      | 4.49                                     | 5.15                                     |                   |
| 6.56                                     | 4.2                                     | 665.66            | 269                      | 4.23                                     | 3.69                                     | 582.29            |
| 9.28                                     | 5.99                                    | 768.3             | 333                      | 6.7                                      | 5.62                                     | 714.67            |

|       |       |        |        |       |       |        |
|-------|-------|--------|--------|-------|-------|--------|
| 4.17  | 1.59  | 607.29 | 245    | 4.09  | 3.88  | 585.45 |
| 6.69  | 4.89  | 826.57 | 222.52 | 4.4   | 4.18  | 781.27 |
| 3.75  | 2.76  | 690.1  | 355    | 4.67  | 3.95  | 570.36 |
| 8.74  | 7.26  |        |        | 6.85  | 4.92  |        |
| 3.8   | 3.36  | 700.84 | 394    | 7.28  | 7.44  | 768.57 |
| 4.06  | 4.66  | 810.45 | 275    | 4.6   | 4     | 1013.5 |
| 4.23  | 4.33  | 732.24 | 186.54 | 4.32  | 5.54  | 633.05 |
| 3.47  |       |        |        |       |       |        |
| 18.54 | 17.65 |        | 371    | 16.67 | 17.07 | 203.09 |
| 3.9   | 3.94  | 658.8  | 249    | 3.42  | 3.54  | 624.58 |
| 4.3   | 4.12  | 584.7  | 336    | 4.58  | 5.15  | 379.87 |
| 5.11  | 4.83  | 1039.7 | 290    | 3.9   | 4.47  | 976.13 |
| 2.6   | 3.88  | 1121.2 | 298    | 3.78  | 5.99  | 794.88 |
| 3.02  | 3.77  | 645.32 | 151.41 | 2.88  | 3.6   | 738.46 |
| 5.08  | 5     | 1026.9 | 169.77 | 6.06  | 5.47  | 725.29 |
| 3.77  | 3.9   | 841.38 | 162.39 | 3.82  | 3.6   | 918.37 |
| 3.42  | 5.31  | 783.57 | 275    | 6.16  | 7.16  | 787.67 |
| 4.28  | 4.71  | 830.71 | 316    | 6.15  | 5.61  | 1095.3 |
| 8.01  | 5.67  | 799.4  | 290    | 5.47  | 2.4   | 787.21 |
| 5.17  | 5.79  | 811.98 | 218.2  | 6.27  | 5.99  | 1056.7 |
| 4.72  | 4.5   | 706.98 | 258    | 3     | 3.54  | 681.96 |
| 7.98  | 8.02  | 744.52 | 306    | 8.8   | 6.38  | 798.23 |
| 4.08  | 3.33  | 658.96 | 163.1  | 3.69  | 2.85  | 620.62 |
| 4.12  | 4.74  | 670.99 | 317    | 5     | 6.11  | 605.21 |

|       |       |        |     |       |      |        |
|-------|-------|--------|-----|-------|------|--------|
| 6.04  | 6.16  | 731.86 | 336 | 5.54  | 4.74 | 711.01 |
| 2.89  | 3.03  | 624.17 | 326 | 3.99  | 5.22 | 583.9  |
| 10.18 | 7.33  | 836.17 | 326 | 11.96 | 6.6  | 640.07 |
| 1.89  | 3.15  | 857.41 | 195 |       |      |        |
|       |       |        |     |       |      |        |
| 7.6   | 7.81  | 667.84 | 336 | 6.69  | 6.77 | 756.6  |
| 2.87  | 4.26  | 682.21 | 427 | 5.01  | 4.85 | 871.06 |
|       |       |        |     |       |      |        |
| 4.19  | 4.34  | 499.8  | 300 | 4.82  | 5.27 | 582.61 |
| 7.56  | 8.69  | 639.01 | 317 | 8.11  | 7.39 | 640.32 |
|       |       |        |     |       |      |        |
| 9.65  | 11.03 | 656.38 | 383 | 5.7   | 9.32 | 605.73 |
|       |       |        |     |       |      |        |
| 4.08  | 2.25  | 891.81 | 308 | 2.5   | 2.52 | 874.49 |
|       |       |        |     |       |      |        |
| 4.36  | 4.34  | 354.57 | 236 | 5.83  | 6.75 | 136.01 |
| 4.43  | 4.06  | 612.88 | 270 | 3.41  | 3.3  | 568.63 |
|       |       |        |     |       |      |        |
| 6.73  | 6.3   | 855.4  | 336 | 6.81  | 6.38 | 766.33 |
|       |       |        |     |       |      |        |
| 8.16  | 9.45  | 725.22 | 336 | 6.79  | 6.25 | 889.67 |
|       |       |        |     |       |      |        |
| 2     | 1.86  | 640.73 | 218 |       |      |        |
|       |       |        |     |       |      |        |
| 5.79  | 7.52  | 695.76 | 465 | 6.99  | 6    | 737.57 |
|       |       |        |     |       |      |        |
| 4.64  | 4.2   | 660.74 | 284 |       | 5.68 | 682.93 |
|       | 12.41 | 908.4  |     | 15.48 | 11   | 832.25 |
|       |       |        |     |       |      |        |
|       | 4.43  | 775.57 | 270 | 4.43  | 4.25 | 455.89 |
|       | 9.02  | 791.94 | 270 |       | 12   | 521.11 |
|       |       |        |     |       |      |        |
| 3.37  | 3.35  | 641.04 | 223 | 3.96  | 4.16 | 620.94 |
|       |       |        |     |       |      |        |
|       | 2.83  | 928.7  | 347 | 3.7   | 4.4  | 677.92 |
|       |       |        |     |       |      |        |
|       | 3.42  |        | 358 |       | 4.46 |        |
| 3.28  | 2.85  | 663.56 | 383 | 4.2   | 4.98 | 635.64 |
| 4.43  | 4.03  | 883.15 | 258 | 3.35  | 3.46 | 859.32 |
|       |       |        |     |       |      |        |
| 3.69  | 3.97  | 769.88 |     | 3.82  | 4.16 |        |
| 3.05  | 3.51  | 873.28 | 24  | 3.27  | 4.05 | 885.97 |
| 5.11  | 5.9   | 687.13 | 240 | 4.59  | 4.97 | 637.16 |

|      |      |        |       |      |      |        |
|------|------|--------|-------|------|------|--------|
| 3.15 | 3.06 | 749.37 | >1200 | 3.48 | 3.48 | 725.17 |
|------|------|--------|-------|------|------|--------|

| Fibrinogen day 4 (mg/dl) | WBC day 4 evening (x10 <sup>3</sup> /μl) | WBC day 5 morning (x10 <sup>3</sup> /μl) | SAA day 5 (μg/ml) | Fibrinogen day 5 (mg/dl) | WBC day 5 evening (x10 <sup>3</sup> /μl) | WBC day 10(x10 <sup>3</sup> /μl) |
|--------------------------|------------------------------------------|------------------------------------------|-------------------|--------------------------|------------------------------------------|----------------------------------|
| 263                      | 2.94                                     | 5.7                                      | 699.47            | 283                      | 5.91                                     | 7.61                             |
| 347                      | 7.27                                     | 3.45                                     | 728.68            | 347                      | 7.41                                     | 14.8                             |
| 230                      | 5.33                                     | 6.33                                     |                   | 217                      | 7.19                                     | 19.11                            |
| 220                      | 3.03                                     | 7.54                                     | 713.86            | 230                      | 6.27                                     |                                  |
| 282                      | 5.08                                     | 7.09                                     | 970.34            | 297                      | 8.41                                     | 10.88                            |
| 367                      |                                          |                                          |                   |                          |                                          |                                  |
|                          |                                          |                                          |                   |                          |                                          |                                  |
| 314                      | 5.7                                      | 9.55                                     | 516.6             | 314                      | 7.47                                     | 11.05                            |
| 207.29                   | 6.53                                     | 9.24                                     |                   | 218                      | 12.46                                    | 10.8                             |
| 246                      | 5.71                                     | 7.9                                      | 863.87            | 251.56                   | 9.32                                     | 10.27                            |
| 314                      | 8.7                                      | 9.52                                     | 661.03            | 314                      | 10.08                                    |                                  |
| 344                      | 6.07                                     | 8.6                                      | 766.13            | 367                      | 6.19                                     | 9.16                             |
| 409                      | 2.92                                     | 6                                        | 707.35            | 333                      | 7.59                                     | 8.18                             |
| 306                      | 6.28                                     | 6.4                                      | 596.53            | 297                      | 9.14                                     | 9.78                             |

|        |       |       |        |        |       |       |
|--------|-------|-------|--------|--------|-------|-------|
| 269    | 5.69  | 7.59  |        | 238    | 8.5   | 7.38  |
| 228.21 | 4.11  | 6.83  | 702.55 | 560    | 7.45  | 6.23  |
| 180.9  | 4.35  | 4.4   | 409.93 | 172.22 | 4.6   | 8.51  |
|        | 6.93  | 4.73  | 665.4  | 219.14 | 3.4   | 11.71 |
|        |       |       |        |        |       |       |
| 394    | 11.2  | 10.43 | 746.65 | 394    | 12.11 | 21.26 |
| 282    | 5.77  | 4.08  | 699.55 | 306    | 4.89  | 7.61  |
|        |       |       |        |        |       |       |
| 189.28 | 7.28  | 5.64  | 456.51 | 249    | 10.64 | 10.35 |
|        |       |       |        |        |       |       |
| 347    | 16.12 | 13.42 | 640.93 | 316    | 11.79 | 16.57 |
| 275    | 4.4   | 5.34  | 982.66 | 282    | 5.88  | 9.17  |
| 316    | 6.12  | 9.95  | 180.74 | 316    | 11.26 | 7.4   |
| 275    | 4.3   | 4.55  | 892.52 | 275    | 4.31  | 6.79  |
| 316    | 6     | 7.22  | 733.05 | 336    | 8.3   | 10.69 |
| 158.01 | 4.2   | 4.72  | 464.49 | 173.63 | 6.1   | 6.08  |
|        |       |       |        |        |       |       |
| 187.29 | 6     | 7.28  | 734.06 | 182.5  | 8.63  | 9.94  |
| 325    | 2.11  | 5.96  | 833.77 | 347    | 7.84  | 11.66 |
| 306    | 8.38  | 11.28 | 719.82 | 371    | 9.73  | 10.95 |
| 306    | 7.14  | 9.1   | 1016.5 | 325    | 11.6  |       |
| 270    | 4.27  | 7.68  | 1081.9 | 258    | 9.4   | 8.6   |
| 217.38 | 5.96  | 5.65  |        | 217    | 7.19  |       |
| 226    | 4.62  | 9.76  | 671.79 | 246    | 6.07  |       |
|        |       |       |        |        |       |       |
| 325    | 6.14  | 6.6   | 527.73 | 317    | 7.25  | 11.27 |
| 385    | 2.96  | 2.69  |        |        | 5.92  | 8.81  |
| 326    | 7.57  | 8.55  | 625.01 | 187.39 | 9.37  | 11.87 |

|        |      |       |        |        |       |       |
|--------|------|-------|--------|--------|-------|-------|
| 336    | 7    | 9.1   | 547.73 | 308    | 7.75  | 9.53  |
| 336    | 8.34 | 7.4   | 704.54 | 358    | 7.07  | 6.93  |
| 358    | 6    | 5.48  | 797.27 | 370    | 10.67 | 14.04 |
|        |      |       |        |        |       |       |
| 326    | 7.12 | 8.62  | 506.01 | 308    | 9.87  | 9.71  |
| 484    | 3.99 | 5.06  | 630.31 | 463    | 6.12  | 16.63 |
| 326    | 6.58 | 5.38  | 335.77 | 308    | 6.7   | 9.4   |
| 336    | 7.19 | 6.58  | 602.22 | 147.73 | 7.83  | 13.15 |
| 173.81 | 8.65 | 8.29  |        | 284    | 9.73  | 10.85 |
| 300    | 2.63 | 2.54  | 799.17 | 336    | 6.84  | 5.91  |
| 236    | 7.29 | 8.97  | 15.17  | 258    |       |       |
| 300    | 3.2  | 6.88  | 488.34 | 317    | 9.46  | 9.49  |
| 326    | 6.76 | 8.82  | 636.68 | 326    | 9.48  | 10.91 |
| 308    | 6.47 | 3.79  | 830.49 | 308    | 6.71  | 9.66  |
|        |      |       |        |        |       |       |
| 463    | 6.43 | 7.02  | 692.54 | 411    | 7.83  | 8.5   |
| 326    |      | 9.17  | 25.79  |        |       |       |
| 284    |      | 10.38 | 588.43 | 308    |       | 25.6  |
| 270    | 5.42 | 6.26  | 296.72 | 300    |       | 8.42  |
| 284    |      | 9     | 466.07 |        |       |       |
|        | 5.88 | 6.31  | 496.98 | 252    | 6.8   | 9.79  |
| 433    | 5.65 | 4.8   | 592.53 | 418    | 8.08  | 11.08 |
| 370    | 5.03 | 3.96  | 633.05 | 358    |       | 7.58  |
| 383    | 6.93 | 6.66  | 583.74 | 383    |       | 7.1   |
| 238    |      | 5.44  | 790.64 | 308    | 5.54  | 6.97  |
|        | 3.59 | 4.69  |        |        | 5.61  | 7.7   |
| 270    | 4.62 | 4.99  | 592.21 | 279    | 8.81  | 9.4   |
| 246    | 4.75 | 4.75  | 606.18 | 299    | 4.46  | 9.72  |

|     |  |      |        |     |  |       |
|-----|--|------|--------|-----|--|-------|
| 235 |  | 8.19 | 429.37 | 240 |  | 10.87 |
|-----|--|------|--------|-----|--|-------|



| SAA day 10 (µg/ml) | Fibrinogen day 10 (mg/dl) |
|--------------------|---------------------------|
| 89.12              | 240                       |
| 453.46             | 326                       |
| 662.44             | 283                       |
|                    |                           |
| 339.5              | 282                       |
|                    |                           |
|                    |                           |
| 5.7                | 282                       |
|                    | 160.31                    |
| 780.14             | 245                       |
|                    |                           |
| 139.38             | 344                       |
| 731.88             | 409                       |
| 104.31             | 297                       |

|        |        |
|--------|--------|
| 3.5    | 235    |
| 118.52 | 203.21 |
| 5.43   | 166    |
| 130.14 | 359    |
| 783.05 | 400    |
| 110.82 | 211    |
| 456.51 | 211    |
|        |        |
| 504.56 | 347    |
| 230.23 | 261    |
| 40.73  | 306    |
| 17.6   | 261    |
| 32.93  | 152.71 |
| 12.63  | 249    |
| 121.69 | 347    |
| 707.62 | 347    |
| 243.76 | 400    |
|        |        |
| 22.38  | 174.78 |
|        |        |
|        |        |
| 24.75  | 152.81 |
| 8.23   | 184.76 |
| 15.69  | 396    |

|        |        |
|--------|--------|
| 6.69   | 300    |
| 6.59   | 317    |
| 566.72 | 463    |
|        |        |
| 6.11   | 284    |
| 257.63 | 279.3  |
| 4.91   | 218    |
|        | 270    |
| 6.98   | 284    |
| 286.02 | 396    |
|        |        |
| 14.32  | 300    |
| 18.13  | 270    |
| 235.33 | 270    |
|        |        |
| 152.67 | 427    |
| 25.79  | 300    |
| 468.31 | 160.92 |
| 10.1   | 132.98 |
|        |        |
| 289    | 78.97  |
| 17.67  |        |
| 14.94  |        |
|        |        |
| 25.59  |        |
|        |        |
| 28.72  | 216    |
| 355.88 | 355    |

|       |     |
|-------|-----|
| 15.16 | 218 |
|-------|-----|
